# Supplementary material
Source: PubMed Central journal article supplement (PMC5892731)
Supplement: fj.201700970.sd1.pdf [file fj.201700970.sd1.pdf]

# Supplement Table 1

## L1 Mutations

| L1 Construct  | Mutation                     |
|---------------|------------------------------|
| S1152L        | Ser1152 → Leu                |
| Y1176L        | Tyr1176 → Leu                |
| S1181L        | Ser1181 → Leu                |
| S1248L        | Ser1248 → Leu                |
| Y1229F        | Tyr1229 → Phe                |
| Y1229H        | Tyr1229 → His                |
| Y1229E        | Tyr1229 → Glu                |
| S1152L/Y1229F | Ser1152 → Leu; Tyr1229 → Phe |
| Y1176L/Y1229F | Tyr1176 → Leu; Tyr1229 → Phe |
| S1181L/Y1229F | Ser1181 → Leu; Tyr1229 → Phe |
| S1248L/Y1229F | Ser1248 → Leu; Tyr1229 → Phe |
| E33A          | Glu33 → Ala                  |
| E33A/S1248L   | Glu33 → Ala; Ser1248 → Leu   |

## Supplement Fig. 1

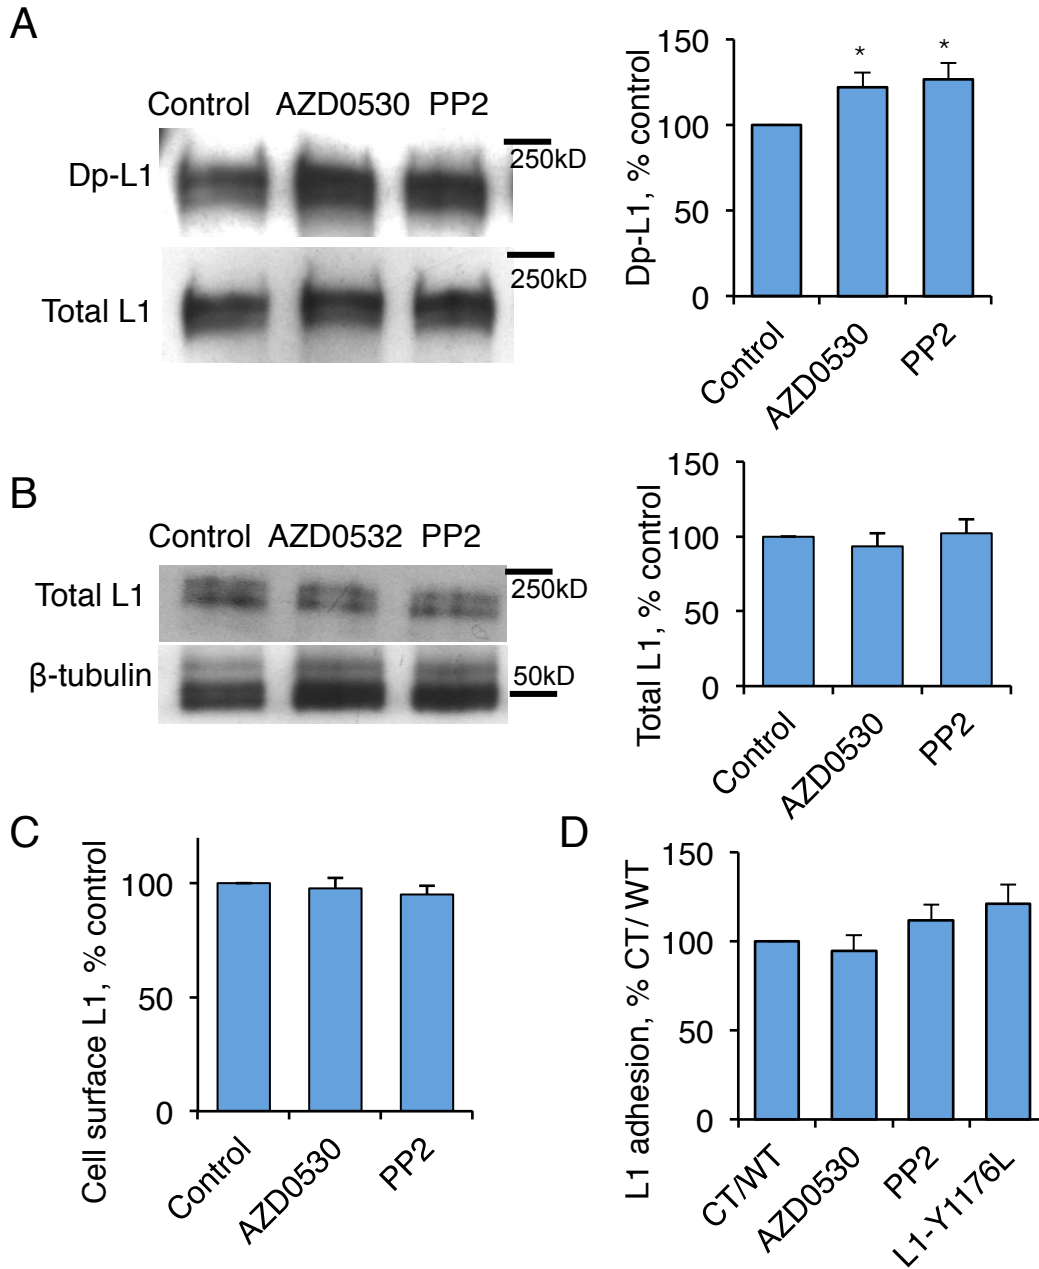

**Supplement Figure 1. Effect of Src family kinase inhibitors and mutations of Y1176 on L1 expression and adhesion.** 2A2-L1<sub>s</sub> cells were incubated with AZD0530 or PP2 and harvested for determination of L1-Y1176 phosphorylation, total L1 expression, cell surface expression of L1, and L1 adhesion, as outlined in Figure 1. (A) Representative Western blot and quantitative densitometry showing L1-dephospho-Y1176 (mAb 74-5H7) and total L1 (mAb UJ127); ( $F = 4.00$ ;  $p = 0.0346$ ),  $n = 7-8$ ; \*  $p < 0.05$ ) (B) Total L1 and b-tubulin expression with total L1 expression normalized to b-tubulin (right panel); ( $F = 2.17$ ;  $p = 0.1574$ ),  $n = 5$ ). (C) L1 cell surface expression determined by FACS using mAb 5G3 against L1; ( $F = 1.49$ ;  $p = 0.2574$ ),  $n = 6$ ). (D) L1 adhesion of 2A2-L1<sub>s</sub> cells in the presence of kinase inhibitors was normalized to values in their absence (CT), and adhesion of NIH/3T3 cells transiently transfected with L1-Y1176L was normalized to values in NIH/3T3 cells transfected with L1-WT (WT); ( $F = 0.31$ ,  $p = 0.82$ ),  $n = 4-32$ ). All values shown are mean  $\pm$  SEM, except for FACS data (geometric mean  $\pm$  SEM).

## Supplement Fig. 2

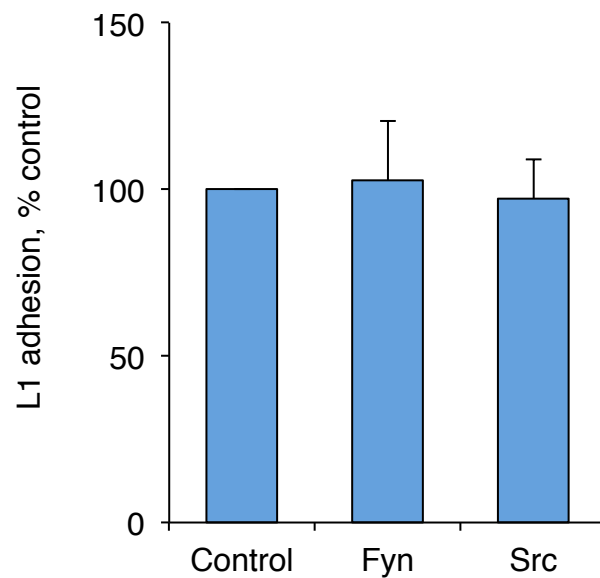

**Supplement Figure 2. Effect of siRNA knockdown of Fyn and Src on L1 adhesion in 2A2-L1s cells.** Mean  $\pm$  SEM % adhesion in cells treated with Fyn or Src siRNA was normalized to values in cells treated with a scrambled siRNA (Control); ( $F = 0.18$ ;  $p = 0.8396$ ),  $n = 8$ .

## Supplement Fig. 3

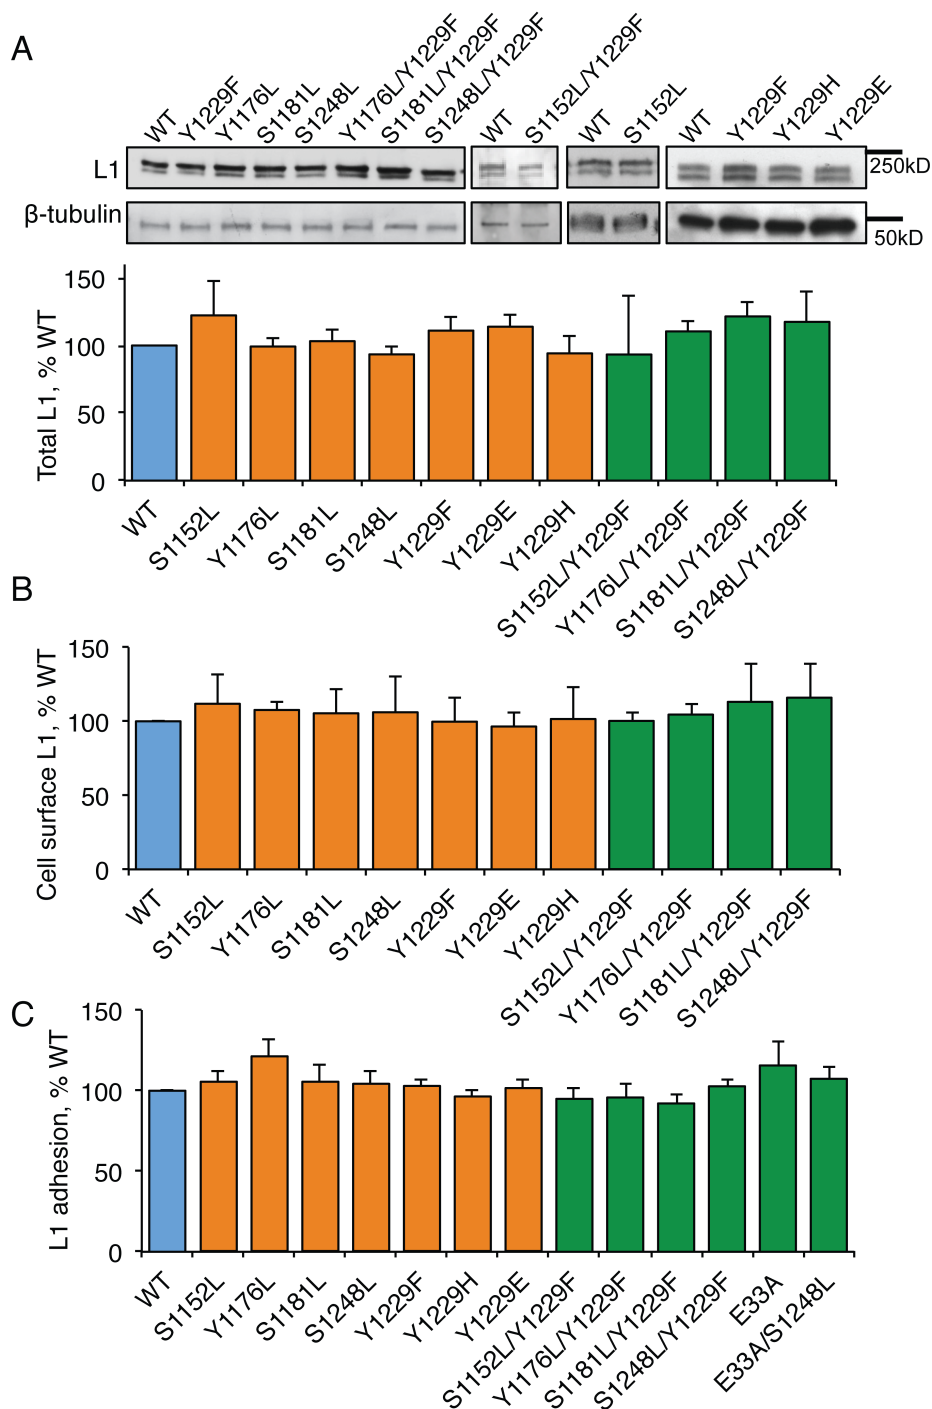

**Supplement Figure 3. Effect of L1 mutations on the expression and adhesion of L1.** All experiments were conducted following transient expression of L1 constructs in NIH/3T3 cells. (A) Total L1 expression, as measured by Western blot, with mean  $\pm$  SEM relative values in mutant L1-expressing cells expressed as a percentage of values obtained in L1-WT-expressing cells; ( $F = 0.52$ ,  $p = 0.8836$ ),  $n = 5-37$ . (B) Geometric mean  $\pm$  SEM cell surface expression of L1 normalized to values in L1-WT-expressing cells; ( $F = 0.19$ ;  $p = 0.9974$ ),  $n = 4-13$ . (C) Mean  $\pm$  SEM % L1 adhesion expressed as a percentage of values in L1-WT-expressing cells; ( $F = 1.66$ ,  $p = 0.0662$ ),  $n = 9-151$ .



## Supplement Fig. 4

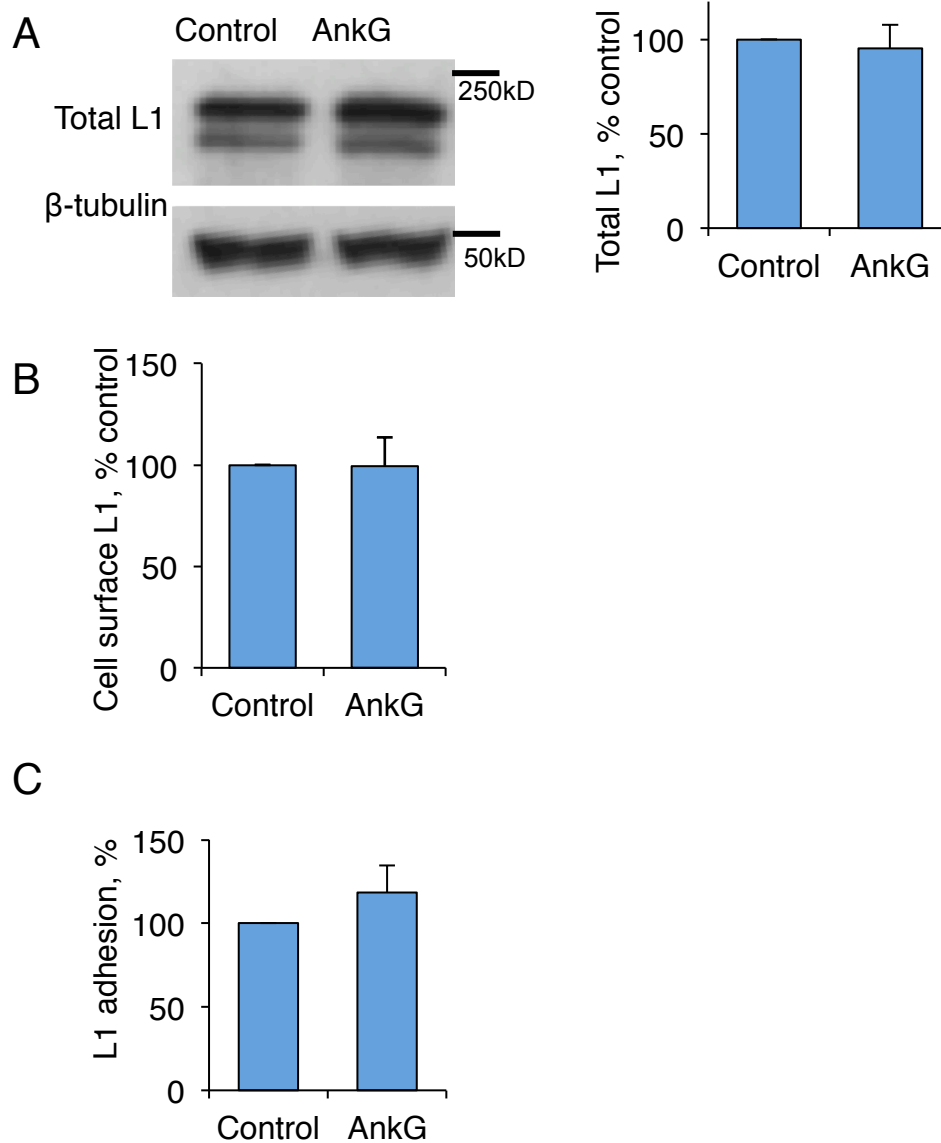

**Supplement Figure 4. Effect of siRNA knockdown of ankyrin-G on the expression and adhesion of L1 in 2A2-L1<sub>s</sub> cells.** All data from ankyrin-G siRNA-expressing cells are normalized to values in cells expressing scrambled-siRNA. (A) Total L1 expression, as measured by Western blot, with quantitative densitometry normalized to b-tubulin;  $t = 0.38$ ;  $p = 0.7176$ ;  $n = 7$ . (B) Geometric mean  $\pm$  SEM cell surface expression of L1, as measured by FACS;  $t = 0.06$ ;  $p = 0.9571$ ,  $n = 5$ . (C) Mean  $\pm$  SEM % L1 adhesion;  $t = 0.13$ ;  $p = 0.8975$ ;  $n = 17$ .

## Supplement Fig. 5

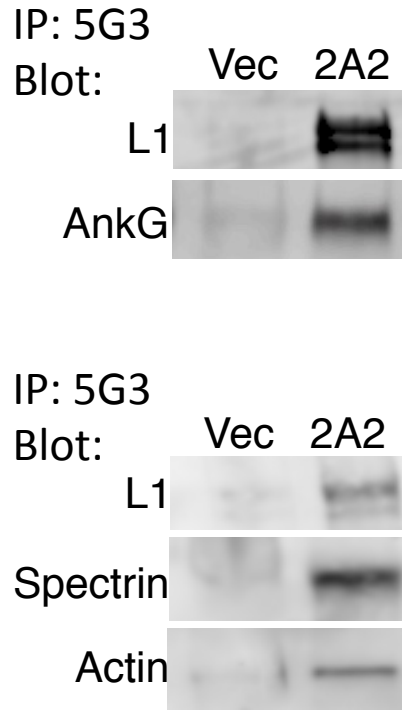

**Supplement Figure 5. The interaction of L1 with ankyrin-G, spectrin and actin is specific.** L1 was immunoprecipitated from whole cell lysates of vector-transfected or hL1-transfected NIH/3T3 cells (2A2-L1<sub>s</sub>) using mAb 5G3. Co-immunoprecipitated proteins were separated and blotted with corresponding antibodies to L1, spectrin, and ankyrin-G (AnkG). Vector-transfected NIH/3T3 cells do not express L1, and mAb 5G3 did not pull down L1, spectrin, or actin from these cells, indicating the specificity of the co-immunoprecipitation procedure. Shown is a representative blot from 6 independent experiments.
